# Supplementary material for: Inclusion Membrane Growth and Composition Are Altered by Overexpression of Specific Inclusion Membrane Proteins in Chlamydia trachomatis L2
Source: PubMed Central journal article supplement (PMC8208519; doi:10.1128/iai.00094-21), 2021-06-16
Supplement: iai.00094-21-s0001.pdf [file iai.00094-21-s0001.pdf]

| Table S1. Primers used in this study |         |                                                    |
|--------------------------------------|---------|----------------------------------------------------|
| Primer type                          | Fwd/Rev | primer sequence                                    |
| <i>standard cloning primers</i>      |         |                                                    |
| pBOMB4-Tet-IncF-FLAG                 | F'      | gatctaaagaggagaaaggatctgcATGGGAGACGTAATGATACAG     |
|                                      | R'      | acatatttgaatggtcgaccggtacTTACTTATCGTCGTCATCCTTG    |
| pBOMB4-Tet-CT813-FLAG                | F'      | gatctaaagaggagaaaggatctgcATGACTACTCTTCCCAATACTTG   |
|                                      | R'      | acatatttgaatggtcgaccggtacttaCTTATCGTCGTCATCCTTGTAG |
| pBOMB4-Tet-CT813                     | F'      | gatctaaagaggagaaaggatctgcATGACTACTCTTCCCAATACTTG   |
|                                      | R'      | tttgaatggtcgaccggtacCTATATCGAACCACGTCTTCCT         |
| <i>qPCR primers</i>                  |         |                                                    |
| <i>euo</i>                           | F'      | CGAAGACTACTCGTTGGGAAATA                            |
|                                      | R'      | AACAGAAGCTCTCCTTGATAAGT                            |
| <i>omcB</i>                          | F'      | CGGTAGGATCTCCCTATCCTATT                            |
|                                      | R'      | CGAACTCTGCTTCACATGGTA                              |
| <i>incE</i>                          | F'      | GGTGTTGACGAAAGGAACAAC                              |
|                                      | R'      | CAGCGATTCCCAAAGCTAAAC                              |
| <i>incG</i>                          | F'      | CGAAATGCTTACAAACGGCTAAG                            |
|                                      | R'      | CAGTACCGCCGCTGATAATATG                             |
| <i>incA</i>                          | F'      | TCTGATCGCTCCACAAATCAC                              |
|                                      | R'      | CTTCTCTTTGCAGATCCTGGTATA                           |
| <i>ct223</i>                         | F'      | GTTGCTTTGGGAGCTGTTATTT                             |
|                                      | R'      | TGAGTTGCTTGTGAGCTTCTAT                             |
| <i>clpP2</i>                         | F'      | GTTAGCGATTTACGACACCATTC                            |
|                                      | R'      | CCCTTTGTCCCTGCAGATAATA                             |
| <i>pgp6</i>                          | F'      | CAAGAAGACATCCTAGCGGTAAG                            |
|                                      | R'      | AGTTGTTGAGGAGAAGTGATCC                             |
| <i>hctB</i>                          | F'      | AACTGTAGCAGCTCGTAAGC                               |
|                                      | R'      | TTTGCGAGCTACAGTCTTCTT                              |
